# Supplementary material
Source: Springer Nature journal article supplement (https://www.springermedizin.de/resource/supplementary/12891_2013_1684_MOESM1_ESM.pdf/9509120)
Supplement: MOESM1 [file 9509120]

**Additional file 1: Description of two main interventions within BMR - psychological group therapy and standard exercise therapy (SET) in both participating rehabilitation centres (control group)**

|                             | REHABILITATION CENTER 1                                                                                                                                                                                                                                                                                                                                                                                                                                                                                                                         | REHABILITATION CENTER 2                                                                                                                                                                                                                                                                                                                                                                                                         |
|-----------------------------|-------------------------------------------------------------------------------------------------------------------------------------------------------------------------------------------------------------------------------------------------------------------------------------------------------------------------------------------------------------------------------------------------------------------------------------------------------------------------------------------------------------------------------------------------|---------------------------------------------------------------------------------------------------------------------------------------------------------------------------------------------------------------------------------------------------------------------------------------------------------------------------------------------------------------------------------------------------------------------------------|
| psychological group therapy |                                                                                                                                                                                                                                                                                                                                                                                                                                                                                                                                                 |                                                                                                                                                                                                                                                                                                                                                                                                                                 |
| theoretical approach        | - cognitive-behavioural approach                                                                                                                                                                                                                                                                                                                                                                                                                                                                                                                | - cognitive-behavioural approach                                                                                                                                                                                                                                                                                                                                                                                                |
| frequency/duration          | - six sessions each 60 minutes                                                                                                                                                                                                                                                                                                                                                                                                                                                                                                                  | - eight sessions each 60 minutes                                                                                                                                                                                                                                                                                                                                                                                                |
| delivery                    | - closed group<br>- consistency of the therapist                                                                                                                                                                                                                                                                                                                                                                                                                                                                                                | - closed group<br>- consistency of the therapist                                                                                                                                                                                                                                                                                                                                                                                |
| objectives and contents     | - introduction to the multimodal therapeutic approach of the BMR<br>- the instruction of a biopsychosocial approach regarding the chronification of pain<br>- the instruction of the avoidance-endurance-model, techniques to control attention,<br>- emergence of a memory of pain<br>- how to use enjoyment and pleasure as a resource,<br>- self-care<br>- helpful thoughts when coping with pain<br>- relationships between pain and social competence<br>- self-management is encouraged with techniques such as homework after the course | - introduction to the multimodal therapeutic approach of the BMR,<br>- education about the biopsychosocial model regarding a chronification of pain<br>- pain acceptance<br>- the role of thoughts and feelings/emotions<br>- the perception of pleasure and enjoyment<br>- pain-related behaviour<br>- sleep hygiene<br>- social competence<br>- excessive demand and retreat<br>- the development of goals for every day life |
| standardization             | - manualised<br>- handouts for patient                                                                                                                                                                                                                                                                                                                                                                                                                                                                                                          | - manualised<br>- handouts for patient                                                                                                                                                                                                                                                                                                                                                                                          |
| additional interventions    | - progressive muscle relaxation<br>- opportunity of regular individual visits of the psychotherapist                                                                                                                                                                                                                                                                                                                                                                                                                                            | - progressive muscle relaxation<br>- Feldenkrais<br>- opportunity of regular individual visits of the psychotherapist                                                                                                                                                                                                                                                                                                           |
| standard exercise therapy   |                                                                                                                                                                                                                                                                                                                                                                                                                                                                                                                                                 |                                                                                                                                                                                                                                                                                                                                                                                                                                 |
| theoretical approach        | - mainly somatic-functional approach                                                                                                                                                                                                                                                                                                                                                                                                                                                                                                            | - mainly somatic-functional approach                                                                                                                                                                                                                                                                                                                                                                                            |
| objectives                  | - physical conditioning via mobilisation and strengthening of the muscles<br>- improvement of cardiopulmonal endurance,<br>- a reduction of pain as result of good postures,<br>- introduction of relief-postures,<br>- education about (patho-) physiological relation as an improvement in well-being due to a better body awareness                                                                                                                                                                                                          | - improvement of physical capability,<br>- reduction of endurance- and avoidance behaviour,<br>- improvement of one's body perception and with existing pain,<br>- testing of one's movement boundaries and the re-gain of confidence in one's own capability<br>- water-based exercise is dedicated to a reduction of pain via unloading and the experience of an improved flexibility in the water                            |
| mean duration               | - approx. 26 hours in four weeks                                                                                                                                                                                                                                                                                                                                                                                                                                                                                                                | - approx. 26 hours in four weeks                                                                                                                                                                                                                                                                                                                                                                                                |

|                                                          |                                                                                                                                                                                                                                                                                                                                                                                                                                                               |                                                                                                                                                                                                                                                                                                                                                                                                                                                                                                                                                                                                                                                                                                                                                                                                                                                                                       |
|----------------------------------------------------------|---------------------------------------------------------------------------------------------------------------------------------------------------------------------------------------------------------------------------------------------------------------------------------------------------------------------------------------------------------------------------------------------------------------------------------------------------------------|---------------------------------------------------------------------------------------------------------------------------------------------------------------------------------------------------------------------------------------------------------------------------------------------------------------------------------------------------------------------------------------------------------------------------------------------------------------------------------------------------------------------------------------------------------------------------------------------------------------------------------------------------------------------------------------------------------------------------------------------------------------------------------------------------------------------------------------------------------------------------------------|
| delivery                                                 | closed group<br>consistency of physical therapist                                                                                                                                                                                                                                                                                                                                                                                                             | - closed group<br>- consistency of physical therapist                                                                                                                                                                                                                                                                                                                                                                                                                                                                                                                                                                                                                                                                                                                                                                                                                                 |
| contents<br>(frequency/<br>duration)                     | <ul style="list-style-type: none"> <li>- strengthening, stabilizing, coordination and flexibility exercises (5 sessions/30 minutes)</li> <li>- introduction to weight-lifting training (2 sessions/30 minutes)</li> <li>- weight-lifting training (5 sessions/60 minutes)</li> <li>- back school consisting of education about anatomy and physiology of the spine, causes of clbp and body mechanics for daily activities (3 sessions/60 minutes)</li> </ul> | <ul style="list-style-type: none"> <li>- strengthening, stabilizing, coordination and flexibility exercises</li> <li>- education about muscular imbalances and the anatomy of the spine</li> <li>- good or healthy posture in every day life: when sitting, standing, getting up, laying down, lifting and carrying objects</li> </ul> <p>(content of 5 sessions/45 minutes and seven sessions/30 minutes)</p> <ul style="list-style-type: none"> <li>- water-based therapy (10 sessions/30 minutes)</li> <li>- instruction to weight-lifting training (2 sessions/45 minutes)</li> <li>- weight-lifting training (6 sessions/30 minutes)</li> <li>- cycling on an ergo-bike (6 sessions/30 minutes)</li> <li>- assessment of physical capability in the beginning of the BMR (1 sessions/100 minutes) and at the end of it (1 sessions/60 minutes) with a functional test</li> </ul> |
| standardization                                          | manualized<br>leaflet with strengthening exercises for the back<br>take-home charts with the strengthening exercises to foster long-term adherence after rehabilitation<br>training schedules                                                                                                                                                                                                                                                                 | <ul style="list-style-type: none"> <li>- manualized</li> <li>- take-home handout with exercises</li> <li>- training schedules</li> </ul>                                                                                                                                                                                                                                                                                                                                                                                                                                                                                                                                                                                                                                                                                                                                              |
| additional interventions*<br>(*delivered in open groups) | introduction to walking (1 session/30 minutes)<br>walking, or cycling on an ergo-bike (7-10 sessions/90 minutes)<br>water-based exercise (6 sessions/30 minutes)                                                                                                                                                                                                                                                                                              | <ul style="list-style-type: none"> <li>- introduction to (nordic-)walking (1 session/45 minutes)</li> <li>- (nordic-)walking (5-9 sessions/60 minutes)</li> </ul>                                                                                                                                                                                                                                                                                                                                                                                                                                                                                                                                                                                                                                                                                                                     |
